# Supplementary material
Source: Springer Nature journal article supplement (https://www.springermedizin.de/resource/supplementary/13019_2010_312_MOESM1_ESM.pdf/9638366)
Supplement: MOESM1 [file 9638366]

Spin: 84  
Tilt: 8

R

IV CONTRAST
